# Supplementary material
Source: publisher figshare collection journal article supplement (https://gsajournals.figshare.com/ndownloader/files/24459005)
Supplement: Supplementary file 1 [file 24459005]

## Sheet: Genomic Mix Information
strain	genomic mixture set
VC20152	1
VC20172	1
VC20239	1
VC20263	1
VC20327	1
VC20413	1
VC20485	1
VC20649	1
VC20738	1
VC40138	1
VC40196	1
VC40238	1
VC40250	1
VC40529	1
VC40545	1
VC40687	1
VC40697	1
VC40721	1
VC40788	1
VC40804	1
VC40870	1
VC20197	2
VC20293	2
VC20435	2
VC20444	2
VC20496	2
VC40575	2
VC40611	2
VC40719	2
VC10128	3
VC20110	3
VC20461	3
VC20647	3
VC20684	3
VC40154	3
VC40174	3
VC40632	3
VC40747	3
VC40764	3
VC20492	4
VC20555	4
VC20617	4
VC20315	5
VC20328	5
VC40212	5
VC40257	5
VC20019	none
VC20319	none

## Sheet: MIP Sequencing Read Counts
Set	Set 1	Set 1	Set 2	Set 2	Set 3	Set 3	Set 4	Set 4	Set 5	Set 5	Set 5 NextSeq	Set 5 NextSeq
MIP.name	wt.bc.unique	snv.bc.unique	wt.bc.unique	snv.bc.unique	wt.bc.unique	snv.bc.unique	wt.bc.unique	snv.bc.unique	wt.bc.unique	snv.bc.unique	wt.bc.unique	snv.bc.unique
VC20152-IIa	1419	95	1837	0	880	0	1340	0	2199	1	30694	2
VC20152-IIb	1298	58	1799	0	873	0	1380	1	2317	0	30340	1
VC20152-IV	943	57	1484	1	643	0	828	1	1558	0	21261	4
VC20152-X	1609	79	2350	0	1089	1	1294	0	2664	0	36642	4
VC40632-I	1354	1	1937	0	775	94	1121	0	2296	0	29310	1
VC40632-II	2013	1	2992	1	1229	143	1917	0	3217	1	43257	34
VC40632-IV	873	0	1201	0	370	40	573	0	923	0	12464	2
VC40632-X	1381	0	2045	0	914	115	1358	0	2256	0	28903	0
VC20684-IIa	1522	0	2107	0	779	75	1171	1	2280	0	30569	1
VC20684-IIb	2254	0	3412	0	1614	192	2176	1	4164	0	56279	2
VC20684-V	1655	0	2464	0	673	79	1231	0	2119	0	30341	2
VC20684-X	1630	0	2610	0	1505	130	1808	0	2594	0	34009	1
VC20485-I	1842	55	2621	0	911	0	1351	0	3061	1	42167	5
VC20485-II	1166	46	1802	0	926	0	1238	0	1376	0	17708	1
VC20485-III	672	22	1005	0	573	0	728	1	1045	0	14703	1
VC20485-V	2132	80	2835	0	1256	0	1854	0	3106	0	40217	6
VC20263-I	1895	117	2683	0	1203	0	1833	0	2965	0	38529	5
VC20263-II	1054	72	1472	0	573	0	839	1	1638	0	21506	2
VC20263-IV	2213	129	2943	0	1245	0	1434	0	2361	0	30687	1
VC20263-V	319	20	603	0	351	0	447	0	639	0	8732	0
VC40788-IV	1899	43	2531	0	1270	0	1673	0	2446	2	33139	0
VC40788-Va	389	15	523	0	211	0	340	0	505	0	6232	1
VC40788-X	1445	27	2156	0	1221	0	1397	0	1989	0	26572	5
VC40719-I	1660	0	2035	167	1144	0	1370	1	2704	1	35789	1
VC40719-III	742	0	926	197	315	0	419	0	966	0	12426	1
VC40719-V	1273	0	1679	164	899	0	1145	0	2052	0	28061	4
VC40719-X	1568	0	1596	129	835	0	1042	0	2133	0	27923	1
VC20496-Ia	1406	0	1110	783	894	1	1398	0	1795	0	22747	2
VC20496-Ib	1718	1	1459	1353	1254	0	1861	0	3165	0	42089	3
VC20496-IV	1643	0	1693	1439	1427	0	2142	0	3402	0	44114	2
VC20496-V	1574	0	1099	1044	818	0	1021	0	2203	0	30121	3
VC40721-I	1417	40	2350	0	985	0	1431	0	2488	0	33545	2
VC40721-II	1461	46	2094	0	771	1	1229	0	2003	0	28188	3
VC40721-IV	1701	57	2219	2	1020	1	1369	0	2769	2	35924	27
VC40721-V	1444	33	2276	1	715	0	1269	0	2341	3	32886	7
VC20738-I	1513	381	2760	0	1239	0	1664	0	3207	0	45299	3
VC20738-III	941	320	1696	0	697	0	928	0	1743	0	24707	1
VC20738-IV	843	159	1542	0	828	0	1166	0	1822	0	23800	4
VC20738-V	1235	332	2253	0	1090	0	1450	0	2547	0	33622	1
VC20315-Ib	1089	0	1624	1	482	0	826	0	1230	821	17862	11715
VC20315-II	1954	0	2270	0	1215	0	1758	0	1766	832	23967	10778
VC20315-III	758	0	1142	0	391	0	644	0	534	326	7275	3843
VC20327-I	756	21	1087	0	502	0	600	0	718	0	9263	4
VC20327-III	1568	42	2040	0	869	0	1269	0	2018	0	26478	2
VC20327-IV	1911	45	2538	1	1260	0	1804	0	2929	1	36804	4
VC20327-V	1638	37	2091	0	1026	0	1262	0	2776	0	34606	0
VC20110-II	2054	0	2848	0	1234	142	1916	0	3055	0	39818	2
VC20110-IIIa	2277	0	3201	0	1186	136	1991	0	3252	0	41181	1
VC20110-IIIb	1512	0	2019	0	876	111	1296	1	2553	0	33686	5
VC20110-IV	554	0	645	0	352	48	505	0	912	0	12470	3
VC20617-IIa	256	0	405	0	295	0	224	93	723	0	9403	0
VC20617-IIb	1063	0	1395	1	593	0	705	435	1884	0	24679	3
VC20617-III	1806	0	3239	0	1827	1	1487	540	3222	0	42722	8
VC20617-X	1745	1	2412	0	1163	0	1212	469	3459	0	43822	4
VC40687-I	1406	91	1892	0	644	0	931	0	1726	0	21855	1
VC40687-II	1415	125	2399	0	1084	0	1518	0	3086	0	39815	7
VC40687-IV	1471	93	2211	0	1049	0	1773	0	2841	0	37423	2
VC40687-V	1548	101	2491	0	992	0	1201	0	2579	0	34074	2
VC40870-I	1948	142	2880	0	1405	0	2038	2	2845	2	35676	7
VC40870-III	1381	104	2043	0	1292	0	1545	0	2924	0	37360	6
VC40870-V	1990	124	3092	0	1766	0	2171	0	3616	2	46646	8
VC40870-X	1280	104	2296	0	1108	0	1484	0	2494	1	31706	5
VC40529-I	1320	128	2152	0	798	0	1486	0	2410	0	32225	3
VC40529-II	1465	100	2448	0	1090	0	1540	0	3313	1	44560	4
VC40529-IV	2284	178	2788	0	1158	0	1989	0	4011	0	49771	3
VC40529-V	1717	118	2467	0	1336	0	1729	0	2851	0	36817	6
VC20239-I	1583	42	2055	0	991	0	1435	0	2124	0	28277	0
VC20239-III	1160	24	1730	0	612	0	975	0	1725	1	21593	4
VC20239-IV	2211	46	3007	0	1896	1	2146	0	3375	0	42738	1
VC20239-V	2176	49	3003	1	1470	0	1986	1	2973	0	40306	12
VC40154-III	763	0	981	0	404	63	771	0	1213	0	15325	3
VC40154-IV	1132	0	1849	1	932	124	1163	0	1730	1	23367	1
VC40154-V	1732	0	2365	1	1006	124	1671	0	3533	0	46338	2
VC40154-X	2622	0	3718	0	1449	162	2070	0	4395	0	57403	3
VC40804-I	1009	22	1585	0	686	0	905	0	1450	0	19219	1
VC40804-II	1741	35	2472	0	1230	0	1786	0	2651	1	36016	7
VC40804-V	1916	45	2604	1	1490	0	1883	1	3778	0	45827	4
VC40212-I	1361	0	1838	1	771	0	1101	1	1434	376	18783	5045
VC40212-II	1791	0	2345	0	1052	0	1507	0	2012	484	25925	6222
VC40212-III	2074	0	3081	1	1409	1	2019	0	2786	628	34050	8488
VC40212-X	1222	0	1841	0	750	0	1432	0	1749	441	24159	5911
VC20492-I	1698	0	2422	0	813	0	626	571	2812	0	37957	0
VC20492-II	1002	0	1573	0	695	0	538	491	1696	0	22732	1
VC20492-IV	1409	0	2058	0	838	0	632	543	2795	0	35157	2
VC20492-X	1178	0	1754	1	721	0	603	522	1884	0	27122	4
VC20647-I	2063	0	2663	0	1202	121	1772	0	2780	0	36491	5
VC20647-V	2128	0	3043	1	1187	95	1634	1	3217	0	41943	8
VC20647-X	1725	0	2403	1	762	82	1598	0	3242	2	42151	5
VC40174-II	1045	1	1356	0	621	100	712	0	1229	0	17280	0
VC40174-IV	1528	0	2166	0	879	114	1478	0	2641	0	36083	1
VC40174-V	1277	0	2055	0	589	85	1077	0	2656	0	34808	2
VC40174-X	1552	0	2372	0	1042	134	1414	0	2387	1	33487	4
VC40545-I	1421	97	2070	0	876	0	1128	0	2364	1	30314	2
VC40545-II	2069	110	3115	0	1275	0	1592	0	3152	0	43667	1
VC40545-V	2090	120	2802	0	1072	0	1570	0	3351	0	45734	3
VC40545-X	2416	121	3377	0	1756	1	2394	0	5201	0	69430	9
VC10128-I	1900	0	2493	0	721	87	1293	0	2732	0	34508	1
VC10128-IV	1845	1	2625	1	1032	113	1677	0	3502	2	46657	28
VC10128-X	1090	0	1817	1	864	125	1270	0	1609	0	20583	2
VC10128-X	2163	0	3276	0	1399	162	2326	0	4160	0	52633	3
VC20555-II	1622	0	2662	0	1306	2	1199	412	2013	1	26302	3
VC20555-IIIa	1953	0	3332	0	1761	0	1537	506	3733	0	49023	4
VC40238-I	1412	31	2124	0	833	0	1361	0	2222	0	31254	1
VC40238-III	1692	28	2112	1	959	0	1233	0	2266	1	29689	6
VC40238-V	360	6	407	0	300	0	398	0	724	0	10238	2
VC40238-X	744	20	1268	0	459	0	819	0	1517	0	19911	3
VC20172-I	2192	91	3038	0	1510	0	1959	0	3348	0	42372	2
VC20172-II	258	10	551	0	275	0	313	0	516	0	7133	2
VC20172-IV	857	42	1308	1	578	0	830	0	1365	0	19432	1
VC20172-X	1662	62	2624	1	1172	1	1631	0	2784	0	38704	15
VC40196-I	1944	70	2550	0	806	0	1239	0	2271	0	31278	1
VC40196-III	2505	90	3693	1	1827	0	2523	1	3875	1	50974	1
VC40196-X	1989	97	3164	1	1059	1	1450	0	2960	1	40943	5
VC40697-I	740	19	1229	0	520	0	728	0	1258	0	17128	3
VC40697-II	1467	42	2228	0	1231	0	1392	0	2493	0	32300	0
VC40697-III	1315	35	2238	0	1215	1	1536	0	2441	0	32194	1
VC40697-V	2207	70	3221	1	1598	0	2163	1	3822	0	48966	2
VC20649-IIa	913	12	1412	0	809	0	937	0	994	0	13651	1
VC20649-IIb	1080	11	1508	0	714	0	841	1	1372	0	18984	1
VC20649-V	1046	16	1539	0	596	0	841	0	1679	0	22128	1
VC20444-I	1175	2	1327	119	590	1	893	2	1664	0	21187	12
VC20444-II	1231	1	1661	163	766	0	1293	0	1795	0	24499	5
VC20444-V	878	0	1148	92	638	0	895	0	1268	0	16080	2
VC20444-X	790	1	1263	94	661	0	925	1	1735	0	21708	1
VC20197-II	1235	0	1647	54	746	0	1022	0	1740	0	23913	1
VC20197-III	581	0	868	21	520	0	654	0	992	1	12725	2
VC20197-IV	706	0	1031	30	458	0	631	0	1118	0	14813	6
VC20197-V	2276	0	3548	100	1864	0	2309	0	3117	2	41244	5
VC40138-IIIa	1620	51	2412	0	1110	0	1574	0	2925	0	42118	6
VC40138-IIIb	1369	40	1943	0	1216	0	1418	0	2314	0	28793	3
VC40138-IV	1709	44	2639	0	1273	0	1726	0	3090	1	39626	4
VC40138-V	929	25	1310	0	480	0	724	1	1253	0	18023	6
VC20461-II	1485	0	1978	0	855	86	1220	1	2159	1	27966	3
VC20461-III	1258	0	2148	1	1098	93	1319	0	2131	0	31199	2
VC20461-IV	680	0	949	0	382	29	614	0	1018	0	12791	0
VC20461-V	1800	0	2630	0	990	104	1525	0	3457	0	47175	3
VC20328-I	1701	0	2562	0	914	1	1292	0	1631	513	21116	6918
VC20328-IIa	2126	0	3162	0	1381	0	1908	0	2979	1061	36437	12620
VC20328-IIb	919	0	1629	0	686	0	1071	0	1516	313	21572	5470
VC20328-X	1609	0	2526	0	1468	0	2003	1	1477	477	20246	6134
VC40747-II	1045	0	1350	0	771	95	1431	0	1826	0	23349	1
VC40747-III	1044	0	1304	0	597	65	913	0	1903	0	26508	6
VC40747-IV	1683	0	2230	0	959	131	1388	0	2724	0	37763	4
VC40747-V	1281	0	1732	0	662	94	1081	0	1936	0	26360	1
VC20293-IIb	721	0	961	54	323	0	570	0	880	0	12305	6
VC20293-III	1912	0	2633	123	1556	1	2212	2	3556	0	45548	3
VC20293-IV	1534	0	1761	70	901	0	1331	0	2050	0	26794	6
VC40250-IV	616	30	931	0	339	0	437	0	827	0	13796	3
VC40250-V	1834	95	2737	0	1392	1	1797	0	3366	1	44157	0
VC40250-X	1530	71	2231	0	974	1	1358	1	2508	1	33045	8
VC40257-I	1102	1	1438	0	551	0	860	0	1575	321	19341	3887
VC40257-II	1729	0	2482	0	1340	0	1644	0	2174	519	29733	6945
VC40257-III	973	0	1830	0	738	0	1123	0	1547	409	20041	4841
VC40257-V	1116	0	1707	0	653	1	970	0	1419	350	19990	4615
VC40575-I	1171	0	1387	121	839	0	1097	0	1683	0	23238	3
VC40575-II	1784	0	2576	210	1259	0	1929	0	2502	0	32266	4
VC40575-III	443	0	575	50	225	0	403	0	589	0	8108	1
VC40575-X	1657	0	2545	197	1115	0	1741	1	2991	0	40579	2
VC40611-II	754	0	1023	158	557	0	626	0	1573	0	18892	2
VC40611-IV	1822	0	2536	273	1574	0	1977	0	3574	0	47439	9
VC40611-X	1056	0	1163	97	545	0	836	0	1573	0	20790	2
VC40764-IIa	1459	0	1698	0	677	32	1104	0	2011	0	27637	1
VC40764-IIb	1292	2	1745	0	711	42	1180	0	1561	0	20991	3
VC40764-V	1310	1	1877	0	627	41	1203	0	1831	0	23946	8
VC40764-X	1412	0	2146	0	1003	51	1393	0	2446	0	32633	7
VC20435-I	1568	0	1778	237	907	0	1412	0	2310	0	30544	3
VC20435-II	1724	0	2434	376	1429	0	1802	0	3424	0	46594	1
VC20435-IV	1475	0	1710	253	732	0	1048	0	1456	0	19282	4
VC20435-V	1489	0	1978	354	970	0	1473	0	2944	0	37890	1
VC20319-I	965	0	1362	0	575	0	881	0	1373	1	18005	9
VC20319-II	1768	0	2895	1	1205	0	1669	0	2918	1	36641	4
VC20319-III	1103	0	1076	0	803	0	1060	0	1556	0	21740	0
VC20319-X	900	0	1585	1	636	0	901	1	1727	0	23687	2
VC20413-IIa	1614	238	2313	0	1303	0	1356	0	2491	1	32699	4
VC20413-IIb	1413	163	2092	0	1001	0	1393	0	2468	0	33155	3
VC20413-V	1109	165	1760	0	803	0	916	0	2068	0	28215	1
VC20413-X	1509	215	2372	0	1058	0	1375	0	2700	0	34292	0
VC20019-MIPS-II-5	781	2	1130	2	540	0	885	2	1298	1	17426	4
VC20019-MIPS-IV-4	2545	5	3622	5	1705	2	2499	4	4122	4	53660	7
VC20019-MIPS-V-16b	1624	4	2356	2	984	5	1527	2	2655	9	35717	5
VC20019-MIPS-X-10	902	5	1503	3	934	3	961	3	1831	3	23636	5
MIPs Removed from analysis due to low read counts
VC40788-Vb	345	5	443	0	221	0	363	0	424	0	6003	0
VC20315-Ia	28	0	26	0	23	0	23	0	26	23	313	162
VC40804-X	1	0	2	0	0	0	0	0	1	0	19	0
VC20647-III	190	0	281	0	130	11	214	0	407	0	4973	2
VC20555-IIIb	169	0	190	0	112	0	132	61	261	0	3398	0
VC20555-V	0	0	0	0	0	0	0	0	0	0	0	0
VC40196-V	2	0	0	0	0	0	2	0	2	0	12	0
VC20649-III	33	1	55	0	10	0	24	0	66	0	909	0
VC20293-IIa	303	0	338	16	150	0	217	0	400	0	5866	0
VC40250-II	186	6	211	0	123	0	210	0	305	0	3650	0
VC40611-I	0	0	0	1	0	0	0	0	0	0	4	0
